# Supplementary material for: Cost-utility and budget impact analyses of the use of NEPA for chemotherapy-induced nausea and vomiting prophylaxis in Italy
Source: PubMed Central journal article supplement — BMJ Open. 2017 Aug 1;7(7):e015645. doi: 10.1136/bmjopen-2016-015645 (PMC5642784; doi:10.1136/bmjopen-2016-015645), 2017-08-01
Supplement: bmjopen-2016-015645supp001.pdf [file bmjopen-2016-015645supp001.pdf]

## Supplementary data

Annex 1. Adjusted rate estimates effectiveness results from the NEPA study in patients receiving either HEC or MEC [15]

| <b>Patients' group</b> | <b>Phase</b>  | <b>Effectiveness parameter</b> | <b>NEPA (%)</b> | <b>APR + PALO (%)</b> | <b>Δ NEPA - APR+PALO (%)</b> | <b>Confidence interval (95%)</b> | <b>P-value</b> |
|------------------------|---------------|--------------------------------|-----------------|-----------------------|------------------------------|----------------------------------|----------------|
| HEC                    | Acute phase   | Complete response              | 92.8            | 86.8                  | + 6.0                        | -0.067 / 0.186                   | 0.3522         |
|                        |               | Complete protection            | 90.0            | 77.9                  | + 12.1                       | -0.024 / 0.264                   | 0.1002         |
|                        | Overall phase | Complete response              | 83.6            | 72.1                  | + 11.5                       | -0.053 / 0.285                   | 0.1774         |
|                        |               | Complete protection            | 78.0            | 63.3                  | + 14.7                       | -0.027 / 0.322                   | 0.0960         |
| MEC                    | Acute phase   | Complete response              | 95.7            | 95.9                  | - 0.2                        | -0.034 / 0.030                   | 0.9125         |
|                        |               | Complete protection            | 92.8            | 92.1                  | + 0.7                        | -0.038 / 0.051                   | 0.7672         |
|                        | Overall phase | Complete response              | 88.1            | 85.6                  | - 2.5                        | -0.040 / 0.091                   | 0.4483         |
|                        |               | Complete protection            | 83.5            | 79.1                  | - 4.4                        | -0.031 / 0.119                   | 0.2521         |

Annex 2: Annual cycles of chemotherapy considered in the model and market shares

|                       |                       |                  | 2016    | 2017    | 2018    | 2019    | 2020    |
|-----------------------|-----------------------|------------------|---------|---------|---------|---------|---------|
| HEC                   | Number of Cycles      |                  | 96,354  | 96,354  | 96,354  | 96,354  | 96,354  |
|                       | Scenario without NEPA | NEPA             | 0.00%   | 0.00%   | 0.00%   | 0.00%   | 0.00%   |
|                       |                       | APR + PALO       | 31.13%  | 32.00%  | 32.89%  | 33.76%  | 34.65%  |
|                       |                       | APR + ONDA       | 52.84%  | 51.97%  | 51.09%  | 50.21%  | 49.33%  |
|                       |                       | fAPR + PALO      | 1.81%   | 2.85%   | 3.93%   | 5.00%   | 6.06%   |
|                       |                       | fAPR + ONDA      | 2.28%   | 3.17%   | 4.03%   | 4.92%   | 5.77%   |
|                       |                       | PALO             | 11.94%  | 10.01%  | 8.06%   | 6.12%   | 4.19%   |
|                       | Scenario with NEPA    | NEPA             | 17.62%  | 39.64%  | 48.45%  | 57.26%  | 61.67%  |
|                       |                       | APR + PALO       | 17.03%  | 14.38%  | 12.63%  | 10.86%  | 9.08%   |
|                       |                       | APR + ONDA       | 51.96%  | 34.35%  | 29.07%  | 22.90%  | 20.26%  |
|                       |                       | fAPR + PALO      | 0.93%   | 1.97%   | 2.17%   | 2.35%   | 2.53%   |
|                       |                       | fAPR + ONDA      | 1.40%   | 2.29%   | 2.27%   | 2.27%   | 2.30%   |
|                       |                       | PALO             | 11.06%  | 7.36%   | 5.41%   | 4.36%   | 4.15%   |
|                       | MEC                   | Number of Cycles |         | 111,970 | 124,855 | 137,629 | 153,458 |
| Scenario without NEPA |                       | NEPA             | 0.00%   | 0.00%   | 0.00%   | 0.00%   | 0.00%   |
|                       |                       | APR + PALO       | 20.32%  | 23.77%  | 28.71%  | 32.93%  | 37.94%  |
|                       |                       | fAPR + PALO      | 3.30%   | 6.20%   | 8.56%   | 10.56%  | 12.02%  |
|                       |                       | PALO             | 76.38%  | 70.02%  | 62.73%  | 56.51%  | 50.04%  |
| Scenario with NEPA    |                       | NEPA             | 9.62%   | 21.56%  | 34.56%  | 43.96%  | 46.22%  |
|                       |                       | APR + PALO       | 11.12%  | 10.83%  | 11.18%  | 10.99%  | 12.82%  |
|                       |                       | fAPR + PALO      | 3.28%   | 2.94%   | 2.62%   | 2.31%   | 2.10%   |
|                       |                       | PALO             | 75.98%  | 64.66%  | 51.64%  | 42.74%  | 38.86%  |
| Totale                |                       |                  | 208,324 | 221,209 | 233,983 | 249,812 | 264,114 |

Annex 3. Budget impact analysis results

| Target population | Scenario      | Cost (Million €) |       |        |        |        |        |
|-------------------|---------------|------------------|-------|--------|--------|--------|--------|
|                   |               | 2016             | 2017  | 2018   | 2019   | 2020   | Total  |
| HEC               | Without NEPA  | 66.8             | 67.4  | 68.0   | 68.6   | 69.2   | 340.1  |
|                   | With NEPA     | 64.1             | 60.3  | 59.0   | 57.4   | 56.6   | 297.4  |
|                   | Budget impact | - 2.7            | - 7.1 | - 9.0  | - 11.2 | - 12.7 | - 42.7 |
| MEC               | Without NEPA  | 50.2             | 58.2  | 66.9   | 77.2   | 87.2   | 339.6  |
|                   | With NEPA     | 48.8             | 55.7  | 63.2   | 71.6   | 79.3   | 318.7  |
|                   | Budget impact | - 1.4            | - 2.5 | - 3.7  | - 5.5  | - 7.9  | - 20.9 |
| HEC + MEC         | Without NEPA  | 117.0            | 125.6 | 134.9  | 145.8  | 156.4  | 679.7  |
|                   | With NEPA     | 112.9            | 116.0 | 122.2  | 129.0  | 135.9  | 616.0  |
|                   | Budget impact | - 4.1            | - 9.6 | - 12.7 | - 16.7 | - 20.5 | - 63.7 |

Annex 4. Results of the budget impact sensitivity analysis

| Target population                                                                                                                                                               | Scenario                                                       | Budget impact (Million €) |        |        |        |        |        |
|---------------------------------------------------------------------------------------------------------------------------------------------------------------------------------|----------------------------------------------------------------|---------------------------|--------|--------|--------|--------|--------|
|                                                                                                                                                                                 |                                                                | 2016                      | 2017   | 2018   | 2019   | 2020   | Total  |
| HEC                                                                                                                                                                             | Base case                                                      | - 2.7                     | - 7.1  | - 9.0  | - 11.2 | - 12.7 | - 42.7 |
|                                                                                                                                                                                 | NEPA effectiveness from the NEPA study in HEC [11]             | - 2.6                     | - 6.9  | - 8.8  | - 11.0 | - 12.4 | - 41.8 |
|                                                                                                                                                                                 | NEPA cost + 10%                                                | -1.9                      | - 5.2  | - 6.7  | - 8.5  | - 9.7  | - 32.1 |
|                                                                                                                                                                                 | NEPA cost - 10%                                                | - 3.4                     | - 8.6  | - 10.9 | - 13.5 | - 15.1 | - 51.6 |
|                                                                                                                                                                                 | No adverse events costs                                        | - 2.2                     | - 6.0  | - 7.6  | - 9.5  | - 10.6 | - 35.9 |
|                                                                                                                                                                                 | Increase of adverse events costs*                              | - 2.4                     | - 6.6  | - 8.4  | - 10.5 | - 11.9 | - 39.8 |
|                                                                                                                                                                                 | CINV event cost + 20%                                          | - 2.7                     | - 7.0  | - 8.9  | - 11.1 | - 12.5 | - 42.3 |
|                                                                                                                                                                                 | CINV event cost – 20%                                          | - 2.6                     | - 6.8  | - 8.7  | - 10.9 | - 12.3 | - 41.4 |
| MEC                                                                                                                                                                             | Base case                                                      | - 1.4                     | - 2.5  | - 3.7  | - 5.5  | - 7.9  | - 20.9 |
|                                                                                                                                                                                 | NEPA effectiveness from the NEPA study in MEC [12]             | - 1.4                     | - 2.6  | - 3.9  | - 5.8  | - 8.1  | - 21.8 |
|                                                                                                                                                                                 | NEPA cost + 10%                                                | - 0.9                     | - 1.4  | - 1.8  | - 2.7  | - 4.6  | - 11.4 |
|                                                                                                                                                                                 | NEPA cost - 10%                                                | - 1.9                     | - 3.8  | - 6.1  | - 8.8  | - 11.6 | - 32.2 |
|                                                                                                                                                                                 | No adverse events costs                                        | - 1.2                     | - 1.7  | - 2.1  | - 3.1  | - 4.9  | - 13.0 |
|                                                                                                                                                                                 | Increase of adverse events costs*                              | - 1.2                     | - 2.3  | - 3.4  | - 5.1  | - 7.3  | - 19.3 |
|                                                                                                                                                                                 | CINV event cost + 20%                                          | - 1.4                     | - 2.7  | - 4.0  | - 5.9  | - 8.3  | - 22.2 |
|                                                                                                                                                                                 | CINV event cost – 20%                                          | - 1.4                     | - 2.6  | - 3.8  | - 5.6  | - 8.0  | - 21.4 |
| HEC + MEC                                                                                                                                                                       | Base case                                                      | - 4.1                     | - 9.6  | - 12.7 | - 16.7 | - 20.5 | - 63.7 |
|                                                                                                                                                                                 | NEPA effectiveness from the NEPA studies in HEC or MEC [11,12] | - 4.0                     | - 9.5  | - 12.7 | - 16.8 | - 20.6 | - 63.7 |
|                                                                                                                                                                                 | NEPA cost + 10%                                                | - 2.8                     | - 6.6  | - 8.5  | - 11.2 | - 14.4 | - 43.5 |
|                                                                                                                                                                                 | NEPA cost - 10%                                                | - 5.3                     | - 12.5 | - 17.0 | - 22.3 | - 26.8 | - 83.9 |
|                                                                                                                                                                                 | No adverse events costs                                        | - 3.4                     | - 7.7  | - 9.8  | - 12.6 | - 15.5 | - 49.0 |
|                                                                                                                                                                                 | Increase of adverse events costs*                              | - 3.7                     | - 8.9  | - 11.8 | - 15.6 | - 19.2 | - 59.1 |
|                                                                                                                                                                                 | CINV event cost + 20%                                          | - 4.1                     | - 9.7  | - 12.9 | - 17.0 | - 20.8 | - 64.5 |
|                                                                                                                                                                                 | CINV event cost – 20%                                          | - 4.0                     | - 9.4  | - 12.6 | - 16.6 | - 20.3 | - 62.8 |
| *The cost of the adverse events equal to 0 € (due to a out-of-pocket management cost) is considered to be 62.5 € (equal to that of the less expensive adverse event considered) |                                                                |                           |        |        |        |        |        |
